# Supplementary material for: The effect of phosphodiesterase-5 inhibitors on cerebral blood flow in humans: A systematic review
Source: PubMed Central journal article supplement (PMC5951021; doi:10.1177/0271678x17747177), 2017-12-19
Supplement: supplementary_material_03.pdf [file supplementary_material_03.pdf]

**Online Supplement: PDE5 inhibitors and cerebral blood flow**

**Supplemental methods SI: PRISMA Checklist**

| Section/topic             | # | Checklist item                                                                                                                                                                                                                                                                                              | Reported on page # |
|---------------------------|---|-------------------------------------------------------------------------------------------------------------------------------------------------------------------------------------------------------------------------------------------------------------------------------------------------------------|--------------------|
| <b>TITLE</b>              |   |                                                                                                                                                                                                                                                                                                             |                    |
| Title                     | 1 | Identify the report as a systematic review, meta-analysis, or both.                                                                                                                                                                                                                                         | 1                  |
| <b>ABSTRACT</b>           |   |                                                                                                                                                                                                                                                                                                             |                    |
| Structured summary        | 2 | Provide a structured summary including, as applicable: background; objectives; data sources; study eligibility criteria, participants, and interventions; study appraisal and synthesis methods; results; limitations; conclusions and implications of key findings; systematic review registration number. | 3-4                |
| <b>INTRODUCTION</b>       |   |                                                                                                                                                                                                                                                                                                             |                    |
| Rationale                 | 3 | Describe the rationale for the review in the context of what is already known.                                                                                                                                                                                                                              | 5-7                |
| Objectives                | 4 | Provide an explicit statement of questions being addressed with reference to participants, interventions, comparisons, outcomes, and study design (PICOS).                                                                                                                                                  | 7                  |
| <b>METHODS</b>            |   |                                                                                                                                                                                                                                                                                                             |                    |
| Protocol and registration | 5 | Indicate if a review protocol exists, if and where it can be accessed (e.g., Web address), and, if available, provide registration information including registration number.                                                                                                                               | 4, 7-8             |
| Eligibility criteria      | 6 | Specify study characteristics (e.g., PICOS, length of follow-up) and report characteristics (e.g., years considered, language, publication status) used as criteria for eligibility, giving rationale.                                                                                                      | 8                  |
| Information sources       | 7 | Describe all information sources (e.g., databases with dates of coverage, contact with study authors to identify additional studies) in the search and date last searched.                                                                                                                                  | 8                  |
| Search                    | 8 | Present full electronic search strategy for at least one database, including any limits used, such that it could be repeated.                                                                                                                                                                               | Online supplement  |
| Study selection           | 9 | State the process for selecting studies (i.e., screening, eligibility, included in systematic review, and, if applicable, included in the meta-analysis).                                                                                                                                                   | 8                  |

### Online Supplement: PDE5 inhibitors and cerebral blood flow

|                                    |    |                                                                                                                                                                                                                        |             |
|------------------------------------|----|------------------------------------------------------------------------------------------------------------------------------------------------------------------------------------------------------------------------|-------------|
| Data collection process            | 10 | Describe method of data extraction from reports (e.g., piloted forms, independently, in duplicate) and any processes for obtaining and confirming data from investigators.                                             | 8           |
| Data items                         | 11 | List and define all variables for which data were sought (e.g., PICOS, funding sources) and any assumptions and simplifications made.                                                                                  | 8           |
| Risk of bias in individual studies | 12 | Describe methods used for assessing risk of bias of individual studies (including specification of whether this was done at the study or outcome level), and how this information is to be used in any data synthesis. | 8 + table 2 |
| Summary measures                   | 13 | State the principal summary measures (e.g., risk ratio, difference in means).                                                                                                                                          | 9           |
| Synthesis of results               | 14 | Describe the methods of handling data and combining results of studies, if done, including measures of consistency (e.g., $I^2$ ) for each meta-analysis.                                                              | n/a         |

| Section/topic                 | #  | Checklist item                                                                                                                                                               | Reported on page #      |
|-------------------------------|----|------------------------------------------------------------------------------------------------------------------------------------------------------------------------------|-------------------------|
| Risk of bias across studies   | 15 | Specify any assessment of risk of bias that may affect the cumulative evidence (e.g., publication bias, selective reporting within studies).                                 | 8 + table 2             |
| Additional analyses           | 16 | Describe methods of additional analyses (e.g., sensitivity or subgroup analyses, meta-regression), if done, indicating which were pre-specified.                             | n/a                     |
| <b>RESULTS</b>                |    |                                                                                                                                                                              |                         |
| Study selection               | 17 | Give numbers of studies screened, assessed for eligibility, and included in the review, with reasons for exclusions at each stage, ideally with a flow diagram.              | 9 + Figure 1            |
| Study characteristics         | 18 | For each study, present characteristics for which data were extracted (e.g., study size, PICOS, follow-up period) and provide the citations.                                 | Tables 1&3 + references |
| Risk of bias within studies   | 19 | Present data on risk of bias of each study and, if available, any outcome level assessment (see item 12).                                                                    | Table 2                 |
| Results of individual studies | 20 | For all outcomes considered (benefits or harms), present, for each study: (a) simple summary data for each intervention group (b) effect estimates and confidence intervals, | Table 1                 |

**Online Supplement: PDE5 inhibitors and cerebral blood flow**

|                             |    |                                                                                                                                                                                      |         |
|-----------------------------|----|--------------------------------------------------------------------------------------------------------------------------------------------------------------------------------------|---------|
|                             |    | ideally with a forest plot.                                                                                                                                                          |         |
| Synthesis of results        | 21 | Present results of each meta-analysis done, including confidence intervals and measures of consistency.                                                                              | n/a     |
| Risk of bias across studies | 22 | Present results of any assessment of risk of bias across studies (see Item 15).                                                                                                      | Table 2 |
| Additional analysis         | 23 | Give results of additional analyses, if done (e.g., sensitivity or subgroup analyses, meta-regression [see Item 16]).                                                                | n/a     |
| <b>DISCUSSION</b>           |    |                                                                                                                                                                                      |         |
| Summary of evidence         | 24 | Summarize the main findings including the strength of evidence for each main outcome; consider their relevance to key groups (e.g., healthcare providers, users, and policy makers). | 17      |
| Limitations                 | 25 | Discuss limitations at study and outcome level (e.g., risk of bias), and at review-level (e.g., incomplete retrieval of identified research, reporting bias).                        | 24-25   |
| Conclusions                 | 26 | Provide a general interpretation of the results in the context of other evidence, and implications for future research.                                                              | 26-27   |
| <b>FUNDING</b>              |    |                                                                                                                                                                                      |         |
| Funding                     | 27 | Describe sources of funding for the systematic review and other support (e.g., supply of data); role of funders for the systematic review.                                           | 27      |

## Online Supplement: PDE5 inhibitors and cerebral blood flow

### Supplemental methods SII: search strategies

#### MEDLINE and EMBASE searches 4<sup>th</sup> August 2017 (via Ovid)

1. (cerebr\* blood flow or CBF).mp. [mp=title, abstract, original title, name of substance word, subject heading word, keyword heading word, protocol supplementary concept word, rare disease supplementary concept word, unique identifier, synonyms]
2. (cerebr\* perfusion or brain perfusion).mp. [mp=title, abstract, original title, name of substance word, subject heading word, keyword heading word, protocol supplementary concept word, rare disease supplementary concept word, unique identifier, synonyms]
3. (cerebr\* circulation or intracran\* perfusion or intracran\* blood flow).mp. [mp=title, abstract, original title, name of substance word, subject heading word, keyword heading word, protocol supplementary concept word, rare disease supplementary concept word, unique identifier, synonyms]
4. 1 or 2 or 3
5. (phosphodiesterase 5 inhibitor or PDE5 inhibitor).mp. [mp=title, abstract, original title, name of substance word, subject heading word, keyword heading word, protocol supplementary concept word, rare disease supplementary concept word, unique identifier, synonyms]
6. (tadalafil or sildenafil or vardenafil or avanafil).mp. [mp=title, abstract, original title, name of substance word, subject heading word, keyword heading word, protocol supplementary concept word, rare disease supplementary concept word, unique identifier, synonyms]
7. 5 or 6
8. 4 and 7

#### Cochrane library search 4<sup>th</sup> August 2017

| ID | Search Hits                                                                                             |
|----|---------------------------------------------------------------------------------------------------------|
| #1 | phosphodiesterase 5 inhibitor or PDE5 inhibitor:ti,ab,kw in Trials (Word variations have been searched) |
| #2 | tadalafil or sildenafil or vardenafil or dipyridamole or avanafil                                       |
| #3 | cerebral blood flow or CBF                                                                              |
| #4 | brain blood flow                                                                                        |
| #5 | Cerebrovascular Circulation or cerebral perfusion                                                       |
| #6 | #1 or #2                                                                                                |
| #7 | #3 or #4 or #5                                                                                          |
| #8 | #6 and #7 Online Publication Date in the last 9 months                                                  |

**Online Supplement: PDE5 inhibitors and cerebral blood flow**

**Supplemental Tables:**

**Table I:** Excluded studies

| <b><u>Study</u></b>                                  | <b><u>Participants</u></b>                    | <b><u>Methods</u></b>                                  | <b><u>Interventions</u></b>                                                                                                 | <b><u>Endpoints</u></b>                                                                                                                      | <b><u>Outcomes</u></b>                                                                                                                      |
|------------------------------------------------------|-----------------------------------------------|--------------------------------------------------------|-----------------------------------------------------------------------------------------------------------------------------|----------------------------------------------------------------------------------------------------------------------------------------------|---------------------------------------------------------------------------------------------------------------------------------------------|
| Cochiarella 2012 <sup>1</sup><br><br>*abstract only* | Spastic quadriparesis;<br><br>N=1             | Case report                                            | Sildenafil 100mg every 24 hours for 7 months                                                                                | Functional assessment                                                                                                                        | Functional improvement                                                                                                                      |
| Hwang 1996 <sup>2</sup>                              | Severe carotid stenosis, 52-76 years old, N=6 | Controlled (participants acting as their own controls) | SPECT:<br><br>- Baseline<br>- Dipyridamole 0.57mg/kg                                                                        | CBF in hemispheric regions of interest left vs right ('asymmetry index'), AND left vs right cerebellum (= control, as posterior circulation) | After dipyridamole: increased hypoperfusion ipsilateral to the side with carotid stenosis, increasing the 'asymmetry index' versus baseline |
| Ito 1999 <sup>3</sup>                                | Healthy adults, 51-71 years old; N=13         | Controlled (participants acting as their own controls) | PET scans (for CBF) performed:<br><br>- at rest<br>- hypercapnia<br>- hypocapnia<br>- after i.v. <u>Dipyridamole</u> stress | Cerebral Blood Flow (CBF) values<br><br>Region of interest = basal ganglia                                                                   | CBF decreased with hypocapnia and dipyridamole stress in line with reduced pCO <sub>2</sub> in both interventions.                          |

**Online Supplement: PDE5 inhibitors and cerebral blood flow**

|                          |                                                                                |                                                                 |                                                                                                                                                                                                                                                     |                                                                 |                                                                                                                                                                                                                                                                                                                                |
|--------------------------|--------------------------------------------------------------------------------|-----------------------------------------------------------------|-----------------------------------------------------------------------------------------------------------------------------------------------------------------------------------------------------------------------------------------------------|-----------------------------------------------------------------|--------------------------------------------------------------------------------------------------------------------------------------------------------------------------------------------------------------------------------------------------------------------------------------------------------------------------------|
| Ito 2002 <sup>4</sup>    | Healthy adults;<br>51-71 years<br>old, N=11                                    | Controlled<br>(participants<br>acting as their<br>own controls) | PET scans (for CBF)<br>performed:<br><ul style="list-style-type: none"><li>- <u>Dipyridamole</u><br/>0.56 mg/kg</li><li>- Baseline.</li></ul> Arterial samples x3<br>during each scan to<br>compare PaCO <sub>2</sub> .<br><br>BP and HR monitoring | CBF<br><br>(all regions normalised<br>to global CBF)            | Reduced global CBF with<br>Dipyridamole correlating with<br>reduced pCO <sub>2</sub> . Regional changes:<br>significant relative increase<br>bilaterally in thalami and pre-<br>frontal cortices                                                                                                                               |
| Kruuse 2000 <sup>5</sup> | Healthy adults;<br>18-50 years<br>old, N=12                                    | Placebo<br>controlled<br>study, single<br>blind                 | Doppler and SPECT:<br><ul style="list-style-type: none"><li>- <u>Dipyridamole</u><br/>0.142mg/kg/min<br/>over 4 minutes</li><li>- 0.9% NaCl</li></ul><br>(1 hour apart)                                                                             | CBF (assessed by<br>SPECT) V <sub>MCA</sub><br>pCO <sub>2</sub> | Dipyridamole caused a decrease in<br>pCO <sub>2</sub> ;<br><br>pCO <sub>2</sub> corrected regional CBF<br>unchanged;<br><br>pCO <sub>2</sub> corrected V <sub>MCA</sub> decreased<br>8.4% ± 11.7 (P < 0.001) after<br>dipyridamole, indicating a mean<br>5.6% ± 6.7 (P = 0.005) relative<br>increase of the arterial diameter. |
| Kruuse 2006 <sup>6</sup> | Healthy<br>migraineurs<br>and non-<br>migraineurs,<br>22-45 years<br>old, N=20 | Controlled trial                                                | Dopplers & end-tidal<br>pCO <sub>2</sub><br><ul style="list-style-type: none"><li>- Baseline</li><li>- Dipyridamole<br/>0.142mg/kg iv<br/>over 4'</li></ul>                                                                                         | V <sub>MCA</sub> and pCO <sub>2</sub> changes<br>Headache score | V <sub>MCA</sub> significantly decreased for<br>60' after dipyridamole infusion in<br>both groups (p=0.15)<br><br>-CO <sub>2</sub> significantly decreased in<br>both groups for 30'<br><br>- corrected for pCO <sub>2</sub> V <sub>MCA</sub><br>changes were not significant<br><br>- all migraineurs and 8/10 controls       |

**Online Supplement: PDE5 inhibitors and cerebral blood flow**

|                                             |                                              |                                          |                                                                                                                                                                                                                |                                                             |                                                                                                                                                                                                                                                                                  |
|---------------------------------------------|----------------------------------------------|------------------------------------------|----------------------------------------------------------------------------------------------------------------------------------------------------------------------------------------------------------------|-------------------------------------------------------------|----------------------------------------------------------------------------------------------------------------------------------------------------------------------------------------------------------------------------------------------------------------------------------|
|                                             |                                              |                                          |                                                                                                                                                                                                                |                                                             | got a headache                                                                                                                                                                                                                                                                   |
| Nagdyman 2006 <sup>7</sup>                  | Neonates with congenital heart disease; N=13 | Observational (no controls, no blinding) | Continuous near infrared spectroscopy & cardiovascular parameters during sildenafil infusion of increasing dose                                                                                                | Cerebral oxygenation                                        | Increase in cerebral (frontal lobe) oxygenated haemoglobin, as well as cerebral tissue oxygenation index.                                                                                                                                                                        |
| Sch lindwein 2010 <sup>8</sup>              | Posterior circulation stroke; N=1            | Case report                              | Goldman field examination, fMRI, perfusion MRI, Doppler: <ul style="list-style-type: none"> <li>- Baseline (12 day period of abstinence)</li> <li>- 4 hrs post 100mg sildenafil</li> </ul>                     | Radiological CBF changes and clinical visual field changes. | Visual fields improved. fMRI (optokinetic stimulus) showed increased activations. Perfusion MRI showed global as well as region specific increases in arterial cerebral blood flow.<br><br>TCD showed increased resting flow in both carotids, whereas vasoreactivity decreased. |
| Schultheiss 2001 <sup>9</sup>               | Healthy adults, 24-41 years old; n=10,       | Double blind cross-over trial            | ERP (event-related brain potentials) in an auditory attention experiment and word recognition task <ul style="list-style-type: none"> <li>- Baseline</li> <li>- post Sildenafil (No measure of CBF)</li> </ul> | Reaction time                                               | Faster reaction time in the auditory stimulus task with sildenafil but no significant difference for the word recognition task.                                                                                                                                                  |
| Zwain 2012 <sup>10</sup><br>*abstract only* |                                              |                                          | <u>Abstract</u> of full-text Al-Amran 2012 publication (accepted in another journal)                                                                                                                           |                                                             |                                                                                                                                                                                                                                                                                  |

**Supplemental References**

1. Cocchiarella A. Partial motor restoration upon administration of sildenafil: a case study. *Dev Neurorehabilitation* 2012; 15: 39–43.
2. Hwang TL, Saenz A, Farrell JJ, et al. Brain SPECT with dipyridamole stress to evaluate cerebral blood flow reserve in carotid artery disease. *J Nucl Med* 1996; 37: 1595–1599.
3. Ito H, Kinoshita T, Tamura Y, et al. Effect of intravenous dipyridamole on cerebral blood flow in humans. A PET study. *Stroke* 1999; 30: 1616–1620.
4. Ito H, Yokoyama I, Tamura Y, et al. Regional changes in human cerebral blood flow during dipyridamole stress: neural activation in the thalamus and prefrontal cortex. *NeuroImage* 2002; 16: 788–793.
5. Kruuse C, Jacobsen TB, Lassen LH, et al. Dipyridamole dilates large cerebral arteries concomitant to headache induction in healthy subjects. *J Cereb Blood Flow* 2000; 20: 1372–1379.
6. Kruuse C, Lassen LH, Iversen HK, et al. Dipyridamole may induce migraine in patients with migraine without aura. *Cephalalgia Int J Headache* 2006; 26: 925–933.
7. Nagdyman N, Fleck T, Bitterling B, et al. Influence of intravenous sildenafil on cerebral oxygenation measured by near-infrared spectroscopy in infants after cardiac surgery. *Pediatr Res* 2006; 59: 462–465.
8. Schlindwein p., Eicke BM, Stoeter P, et al. Sildenafil improves scotoma after posterior cerebral infarctions: A case report. *J Neurol* 2010; 257: 674–677.
9. Schultheiss D, Müller SV, Nager W, et al. Central effects of sildenafil (Viagra) on auditory selective attention and verbal recognition memory in humans: a study with event-related brain potentials. *World J Urol* 2001; 19: 46–50.
10. Zwain A, Hadi N, Al Mudhaffer A, et al. Effect of sildenafil on cerebrovascular reactivity in patients with type 2 diabetes mellitus. *J Cardiol*. Epub ahead of print March 2012. DOI: 10.1016/S0167-5273%2812%2970005-0



## **Online Supplement: PDE5 inhibitors and cerebral blood flow**
